# Supplementary material for: Multiplex Site-Directed Gene Editing Using Polyethylene Glycol-Mediated Delivery of CRISPR gRNA:Cas9 Ribonucleoprotein (RNP) Complexes to Carrot Protoplasts
Source: MDPI journal article supplement (doi:10.3390/ijms221910740), 2021-10-04
Supplement: s1 [file s1]

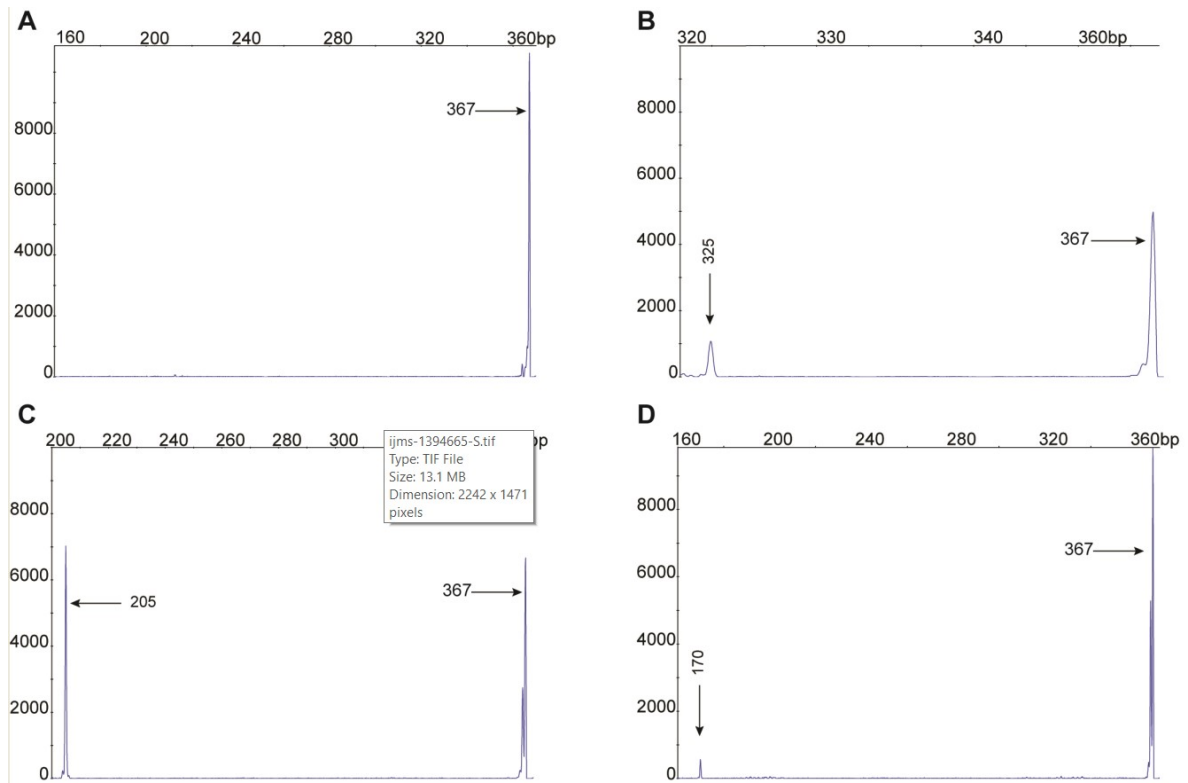

**Figure S1.** Cleaved fragments after incubation of a 309 bp long *F3H* gene fragment with one of the pre-assembled RNP complexes and detected by using a fluorescent-PCR capillary electrophoresis. RNPs used for in vitro DNA cleavage: (A) no RNP, (B) RNP1, (C) RNP2, (D) RNP3.
